# Supplementary material for: Multimorbidity and complex multimorbidity in Brazilian rural workers
Source: PLoS One. 2019 Nov 19;14(11):e0225416. doi: 10.1371/journal.pone.0225416 (PMC6863555; doi:10.1371/journal.pone.0225416)
Supplement: S1 Database — (XLSX) [file pone.0225416.s001.xlsx]

## Sheet: DATABASE
ID	Sex	Age Group	Race/color	Marital Status	Scholling	Socioeconomic class	Land ownership	Type of occupational contact with pesticide	Total number of pesticides used	Use of PPE	Frequency of contact with pesticide	Smoking	Practices physical activity	Alcohol consumption	Medical diagnosis of poisoning by pesticides	Waist circumference	Health self-assessment	Multimorbidity	Complex Multimorbidity
1	1	0	0	1	2	1	1	2	0	3	2	0	0	0	1	1	2	1	1
2	1	2	1	1	0	1	1	2	0	3	4	1	0	0	1	0	2	1	0
3	1	0	0	1	2	1	0	1	9999	2	1	0	0	1	1	1	1	0	0
4	1	2	0	1	0	2	0	2	0	3	4	0	0	0	1	1	2	0	0
5	0	0	0	1	2	1	0	1	1	1	2	0	0	1	1	0	1	0	0
6	0	2	0	1	0	1	0	2	0	3	4	1	0	1	1	1	2	1	0
7	0	2	0	2	2	0	0	1	1	1	2	0	0	1	1	0	1	0	0
8	0	2	0	2	0	2	0	1	1	2	2	0	0	1	0	1	1	0	0
9	1	1	0	1	1	2	0	2	0	3	4	0	0	0	1	1	1	1	0
10	1	2	0	1	0	2	0	1	9999	1	1	0	1	0	1	1	1	1	0
11	0	1	0	1	0	1	0	1	2	1	1	0	0	0	1	0	1	0	0
12	1	0	0	1	1	2	1	2	0	3	1	0	0	0	1	1	1	0	0
13	1	1	1	1	0	2	0	1	1	1	1	0	1	0	1	0	1	0	0
14	0	2	1	1	1	2	0	2	0	3	4	0	0	0	1	1	1	1	0
15	0	2	1	2	0	2	0	1	1	2	2	0	0	0	0	1	1	0	0
16	0	2	0	1	0	0	0	2	0	3	4	0	0	1	1	0	1	0	0
17	1	0	0	1	2	2	0	2	0	3	1	0	0	0	0	0	2	0	0
18	0	2	0	1	2	1	0	2	0	3	4	0	0	1	1	0	1	0	0
19	1	2	0	2	1	2	0	1	1	1	2	0	0	0	1	1	1	0	0
20	1	0	0	1	2	1	0	2	0	3	4	0	0	0	1	0	1	1	1
21	1	2	0	1	0	1	1	1	9999	1	2	0	0	0	1	1	2	1	0
22	0	2	0	1	1	1	0	1	1	1	1	0	0	0	1	1	1	1	1
23	1	2	0	2	0	1	1	1	1	1	2	0	1	0	1	1	1	1	1
24	1	0	0	1	2	1	0	1	1	9999	1	0	0	0	1	0	2	0	0
25	0	1	1	1	0	1	0	2	0	3	4	0	0	1	0	0	1	0	0
26	0	2	0	1	1	1	0	1	1	1	1	0	0	0	1	0	1	0	0
27	1	2	0	1	0	2	0	2	0	3	2	0	0	0	1	1	2	1	1
28	1	0	0	1	1	2	0	1	1	1	2	0	0	1	1	1	1	0	0
29	0	0	0	0	1	0	0	2	0	3	4	1	0	1	1	0	1	0	0
30	1	2	0	2	0	2	0	2	0	3	4	0	0	0	1	1	2	0	0
31	1	1	0	1	2	1	1	2	0	3	1	0	0	0	1	0	1	0	0
32	0	1	0	1	2	1	0	1	2	1	1	0	0	1	1	1	1	0	0
33	0	2	0	1	0	2	0	1	2	1	1	1	0	1	1	1	2	1	0
34	0	1	0	0	0	2	1	2	0	3	1	0	1	0	1	0	1	0	0
35	0	0	0	1	0	1	0	1	1	2	1	0	0	0	1	0	2	0	0
36	1	2	0	1	0	1	0	1	1	1	2	0	0	0	1	1	2	1	1
37	1	2	0	1	0	2	0	2	0	3	4	0	0	0	1	1	2	0	0
38	0	0	1	1	1	1	1	2	0	3	4	0	0	0	1	0	1	0	0
39	0	1	0	1	1	1	0	2	0	3	4	0	0	1	0	1	1	0	0
40	0	2	0	1	0	0	0	1	2	1	1	0	0	1	1	0	1	0	0
41	0	2	0	1	1	1	0	1	1	2	1	0	1	0	1	1	1	0	0
42	0	2	0	1	0	1	0	1	1	1	2	0	0	1	1	0	2	0	0
43	1	1	0	1	0	2	1	2	0	3	2	0	0	0	1	1	2	1	0
44	1	2	0	1	0	2	0	2	0	3	4	0	0	0	1	0	1	1	0
45	0	1	0	1	0	2	1	1	2	1	1	0	0	1	1	0	1	1	1
46	1	1	0	0	1	1	1	2	0	3	9999	0	0	0	1	1	2	0	0
47	1	1	0	1	1	1	0	1	1	1	2	0	1	0	0	0	2	0	0
48	1	1	0	1	0	1	0	1	1	1	1	0	0	1	1	0	1	0	0
	1	2	0	1	1	1	0	1	2	2	2	0	0	1	1	1	1	0	0
50	0	2	0	2	0	1	0	1	2	2	1	0	0	0	1	0	2	0	0
51	0	2	0	1	2	1	0	2	0	3	4	0	0	1	1	0	1	0	0
52	1	2	0	1	0	1	0	2	0	3	1	0	1	0	1	1	1	0	0
53	0	1	0	1	2	1	0	1	1	1	2	0	0	1	1	0	1	0	0
54	1	2	0	2	0	1	0	1	1	1	1	0	0	0	1	1	1	1	0
55	0	1	0	1	0	2	0	1	2	2	1	0	0	1	1	0	1	0	0
56	0	2	1	2	0	2	1	1	1	1	2	1	0	0	0	0	1	0	0
57	0	1	0	0	0	0	0	1	2	2	1	0	0	0	1	0	2	0	0
58	1	1	0	1	0	1	0	2	0	3	2	0	0	0	1	1	2	0	0
59	1	0	0	1	2	1	0	2	0	3	2	0	1	0	1	0	1	0	0
60	1	1	0	1	0	1	1	2	0	3	9999	0	0	0	0	1	2	1	1
61	1	1	0	1	2	1	0	2	0	3	9999	0	0	0	1	0	1	0	0
62	0	2	0	1	1	1	0	2	0	3	4	0	0	1	1	1	1	1	0
63	0	2	0	1	1	1	0	1	1	1	2	1	0	1	1	0	2	1	1
64	1	0	0	1	0	1	0	2	0	3	1	0	1	0	1	0	1	0	0
65	0	1	0	1	0	1	1	1	1	2	1	0	0	0	0	1	2	1	1
66	0	2	0	1	2	1	0	1	1	1	2	0	0	0	0	1	1	1	1
67	1	0	0	0	0	1	1	1	9999	2	1	0	0	1	1	1	1	1	0
68	0	2	0	1	0	1	0	1	2	1	1	0	0	1	1	1	1	1	0
69	0	2	1	1	0	2	0	1	1	1	2	1	0	0	1	0	1	1	1
70	1	0	1	1	0	2	0	2	0	3	1	0	0	0	1	0	2	1	1
71	0	1	1	1	1	2	0	1	1	1	1	0	0	0	1	0	1	1	0
72	0	2	0	1	0	1	1	1	1	1	2	1	0	1	1	1	1	1	1
73	1	1	0	1	0	2	0	2	0	3	4	0	0	0	1	0	1	0	0
74	1	2	0	2	0	2	0	2	0	3	4	0	0	0	1	1	1	1	0
75	1	2	0	1	1	1	1	1	9999	9999	1	1	0	0	1	1	2	1	1
76	1	2	0	1	0	1	0	2	0	3	2	0	0	1	1	1	2	0	0
77	0	0	0	1	1	0	0	1	2	1	1	0	0	0	9999	0	1	0	0
78	0	0	0	1	1	2	0	1	1	1	1	1	0	1	1	0	1	0	0
79	1	2	0	1	0	1	0	1	1	1	2	0	0	0	1	1	2	0	0
80	0	2	0	1	0	0	0	1	9999	1	1	0	0	1	1	1	1	1	0
81	1	2	1	1	0	1	1	1	1	9999	2	0	0	0	0	1	1	1	0
82	0	2	1	1	0	2	1	1	1	2	1	1	0	1	1	0	1	0	0
83	0	2	1	1	0	1	0	1	1	1	2	1	0	1	1	1	2	1	0
84	1	2	0	1	0	1	0	2	0	3	4	0	0	1	1	1	1	1	0
85	0	1	0	1	0	2	1	1	1	2	2	0	0	0	1	0	1	1	0
87	1	0	1	1	2	2	1	2	0	3	9999	0	1	1	1	1	1	0	0
88	0	2	0	1	1	1	0	2	0	3	4	1	1	0	1	0	2	1	1
89	1	1	0	1	2	0	0	1	1	1	1	0	0	0	1	1	2	1	0
90	0	1	0	0	1	2	0	1	2	1	1	1	0	1	1	0	1	1	0
91	1	1	0	1	0	1	0	1	1	1	2	0	0	0	1	1	2	0	0
92	0	0	0	1	1	1	0	1	1	1	1	0	0	1	1	0	1	0	0
93	1	1	0	1	0	1	1	2	0	3	9999	0	0	0	1	1	1	0	0
94	1	2	0	1	0	2	0	1	1	1	1	0	0	0	0	1	2	1	1
95	1	2	0	1	0	1	0	1	9999	1	1	0	1	1	1	1	2	1	1
96	0	1	0	0	0	1	1	1	2	1	1	0	0	1	1	1	2	0	0
97	1	1	0	1	0	1	0	2	0	3	9999	0	0	1	1	1	2	0	0
98	0	0	0	1	2	0	0	1	1	1	1	0	0	1	1	0	2	1	0
99	1	1	0	1	1	2	0	2	0	3	1	0	0	1	0	1	2	1	0
100	1	0	0	1	0	2	1	2	0	3	2	0	0	1	1	0	1	0	0
101	0	2	0	1	0	1	0	1	1	2	1	1	0	0	1	0	1	1	0
102	0	2	0	1	0	1	0	1	1	1	2	1	0	0	1	0	1	0	0
103	1	2	1	1	1	1	0	2	0	3	1	0	0	0	1	1	2	1	0
104	0	2	0	1	0	2	1	1	2	1	1	1	0	0	1	0	2	1	1
105	0	0	0	0	1	1	1	1	9999	2	2	0	0	1	1	0	1	0	0
106	0	2	0	1	0	1	0	1	1	1	2	1	0	0	1	1	1	1	0
107	0	2	0	1	0	1	0	1	2	2	1	0	0	1	1	0	2	1	0
108	0	0	0	1	1	2	0	1	2	1	1	0	0	1	1	0	2	1	0
109	0	1	0	1	0	2	1	1	1	1	1	1	0	1	0	0	2	1	0
110	1	2	0	1	0	2	1	1	1	1	1	0	1	0	1	1	1	0	0
111	1	0	0	1	2	1	0	1	1	1	1	0	1	0	0	0	1	1	0
112	1	2	1	1	0	1	0	2	0	3	2	0	0	0	1	1	2	1	1
113	0	2	0	1	0	2	0	1	1	1	2	1	0	0	1	9999	1	0	0
114	1	0	0	1	1	2	1	1	9999	1	1	0	0	1	1	0	2	1	1
115	1	0	0	1	2	1	0	2	0	3	1	0	0	0	1	1	1	0	0
116	1	2	0	1	0	2	1	2	0	3	1	0	0	0	1	1	2	1	1
117	1	0	0	1	2	2	0	1	1	1	1	0	0	1	1	0	1	0	0
118	1	0	0	1	1	2	1	2	0	3	1	0	0	0	1	1	2	0	0
119	0	1	0	0	1	2	1	1	1	1	1	1	0	1	1	1	1	0	0
120	0	2	0	2	0	2	0	1	1	1	1	0	0	0	0	1	1	1	1
121	0	1	0	1	1	1	0	1	2	1	2	0	0	1	1	1	1	0	0
122	0	0	0	0	2	1	0	1	1	1	2	0	1	1	1	0	1	0	0
123	0	1	1	1	0	2	1	2	0	3	4	1	0	0	1	0	1	1	1
124	0	2	0	1	2	2	0	1	2	1	2	1	0	1	1	1	2	1	1
125	0	2	0	1	0	2	0	1	1	1	1	1	0	0	1	1	1	1	0
126	0	2	1	1	0	1	1	2	0	3	4	1	0	1	0	0	1	1	1
127	0	2	0	1	0	0	0	1	9999	1	2	0	0	0	1	1	1	1	0
128	1	2	0	1	0	2	1	1	9999	2	2	1	0	1	1	1	1	1	0
129	0	2	0	2	0	1	0	1	2	1	1	0	0	0	1	1	1	0	0
130	1	1	1	1	0	2	1	1	1	1	2	0	0	1	1	0	1	0	0
131	0	2	0	1	2	0	0	1	1	1	2	0	0	0	1	0	1	0	0
132	1	2	0	1	0	2	1	2	0	3	1	0	0	0	1	1	2	1	1
133	1	0	0	1	2	1	0	1	1	2	1	0	0	1	1	1	1	0	0
134	0	2	0	1	0	0	0	1	1	1	1	0	0	1	1	0	2	0	0
135	1	1	1	1	0	1	0	1	1	1	1	0	1	0	1	1	1	1	0
136	0	0	0	0	2	0	0	1	1	1	2	1	1	1	1	0	1	0	0
137	0	2	1	1	0	0	0	1	1	2	2	0	0	0	0	0	1	0	0
138	1	0	0	0	2	2	0	2	0	3	1	0	0	0	1	1	1	1	1
139	1	2	0	2	0	2	0	1	2	1	2	0	0	0	1	1	2	1	1
140	1	2	0	1	0	2	0	1	9999	1	2	0	0	1	1	1	1	1	0
141	0	2	1	1	1	1	0	1	1	2	2	0	0	1	1	0	1	1	1
142	0	1	0	1	2	1	0	1	1	2	2	0	1	1	1	0	2	0	0
143	0	0	0	0	1	1	1	2	0	3	2	1	0	1	1	0	1	1	0
144	1	2	0	1	0	1	0	2	0	3	4	0	0	0	1	1	1	0	0
145	1	2	0	1	0	1	0	2	0	3	2	0	0	0	1	1	2	1	0
146	0	0	0	1	2	1	0	1	1	1	1	0	1	1	1	0	2	0	0
147	1	1	1	1	1	1	0	1	9999	1	1	0	0	1	1	0	1	0	0
148	1	1	0	1	2	1	0	2	0	3	2	0	0	0	1	0	1	1	0
149	0	2	0	1	2	1	0	1	1	2	2	0	0	0	1	0	1	0	0
150	1	1	1	1	1	1	0	1	2	1	1	0	0	0	1	1	1	0	0
151	0	0	0	1	2	1	0	1	1	2	2	0	1	0	1	0	1	0	0
152	1	2	1	1	0	2	1	2	0	3	2	1	1	0	1	1	2	1	1
153	1	1	0	1	2	1	1	1	1	1	2	0	0	0	1	1	1	1	1
154	0	0	1	1	2	2	1	1	1	2	2	0	1	0	1	0	2	0	0
155	0	2	1	1	0	2	1	1	1	1	2	1	0	1	0	1	1	1	1
156	1	2	1	0	0	2	1	1	1	2	1	1	0	0	1	0	1	0	0
157	0	1	0	1	1	2	0	1	1	1	2	0	0	1	1	0	1	0	0
158	1	1	1	1	0	2	1	1	9999	1	1	0	0	0	1	1	1	0	0
159	1	0	1	1	1	0	0	1	9999	2	2	0	0	1	1	0	1	0	0
160	0	0	0	1	1	1	0	1	1	2	2	0	0	0	1	1	1	1	1
161	1	2	0	1	0	1	1	1	9999	1	2	0	1	0	1	1	1	0	0
162	1	2	0	1	0	1	0	1	1	1	2	0	0	1	1	1	2	0	0
163	1	2	0	1	0	2	0	1	1	1	2	0	0	0	1	1	2	0	0
164	1	2	0	1	0	1	0	2	0	3	9999	0	0	0	1	1	1	0	0
165	1	1	0	1	2	1	0	1	2	1	1	0	0	1	1	1	1	0	0
166	1	2	0	1	0	1	0	1	1	9999	2	0	1	0	1	1	1	0	0
167	0	1	0	1	0	1	0	1	1	2	1	0	0	1	1	0	1	1	0
168	0	2	0	1	0	1	0	1	1	1	1	1	0	1	1	0	2	1	1
169	0	2	0	1	0	1	0	1	2	1	1	0	0	0	1	1	2	1	1
170	0	1	0	1	2	1	0	1	1	1	2	0	0	0	1	1	1	0	0
171	0	0	0	1	1	1	0	1	2	1	2	0	0	1	1	0	1	1	0
172	0	0	0	0	0	0	0	1	1	2	2	0	1	1	1	0	1	0	0
173	1	1	0	2	1	1	0	1	2	1	1	0	0	0	1	1	1	0	0
174	0	2	0	1	0	2	0	1	1	1	2	1	0	1	1	1	2	1	0
175	0	2	0	1	0	1	0	1	9999	2	1	0	0	0	1	1	1	1	1
176	1	2	0	2	0	1	1	1	1	1	1	0	0	0	1	1	2	1	0
177	0	1	1	1	0	2	1	1	1	1	2	1	0	1	1	1	1	0	0
178	0	2	1	1	1	1	1	2	0	3	1	1	0	1	0	0	2	1	0
179	0	2	1	1	0	1	1	1	1	1	2	1	0	0	1	1	1	1	1
180	1	2	0	1	0	1	0	1	1	9999	2	0	0	0	0	0	2	1	0
181	1	2	0	1	0	0	0	1	1	1	2	0	0	0	1	1	1	0	0
182	1	2	0	1	0	1	0	1	1	2	2	0	1	0	1	1	2	1	1
183	1	1	0	1	1	1	1	1	1	2	1	0	0	0	1	1	1	0	0
185	1	2	0	1	0	2	1	2	0	3	9999	0	1	0	1	1	1	1	0
186	0	2	1	1	0	1	0	1	1	2	1	1	0	1	1	1	1	0	0
187	1	2	0	1	0	1	1	2	0	3	2	0	0	0	1	1	1	1	0
188	1	2	0	2	0	2	1	2	0	3	9999	0	0	1	1	1	1	0	0
189	0	2	0	1	2	2	1	1	1	1	1	0	0	0	1	1	2	1	1
190	1	2	0	0	0	2	1	2	0	3	4	0	0	0	0	1	2	1	1
191	1	2	0	1	0	2	0	1	9999	1	1	0	0	0	1	1	1	0	0
192	0	2	0	1	0	1	1	1	1	1	2	1	0	1	1	0	1	0	0
193	1	2	1	1	0	1	1	1	1	9999	1	0	0	0	1	0	2	1	0
194	1	0	0	1	0	0	0	1	1	1	1	0	0	1	1	0	2	0	0
195	1	2	0	1	0	1	0	1	1	2	2	0	0	0	1	1	2	1	0
196	0	2	0	1	0	2	0	1	2	2	1	0	0	1	1	0	1	1	0
197	1	2	0	2	0	2	1	2	0	3	1	0	0	0	1	1	1	0	0
198	1	0	1	1	1	1	0	1	1	2	1	0	0	0	1	0	2	0	0
199	1	2	0	1	0	2	1	2	0	3	1	0	0	0	1	1	1	1	1
200	0	0	0	0	0	1	0	1	1	2	1	1	0	1	1	0	2	0	0
201	0	1	0	1	1	1	1	1	1	1	1	0	0	0	1	0	1	1	0
202	1	1	0	1	0	2	0	2	0	3	1	0	0	0	1	0	1	0	0
203	0	1	0	1	0	1	0	1	2	2	1	0	0	1	0	0	2	1	1
204	0	0	0	1	0	2	0	1	2	1	1	0	0	1	1	0	1	0	0
205	1	2	0	1	2	1	0	2	0	3	2	0	0	0	1	1	1	1	0
206	1	1	0	1	0	2	0	2	0	3	1	0	0	0	1	0	1	0	0
207	0	2	0	2	2	1	0	1	1	1	2	0	1	1	1	0	2	0	0
208	0	2	0	1	0	1	0	1	2	1	1	0	0	0	0	0	2	0	0
209	1	2	0	1	0	1	0	1	9999	2	1	0	0	0	1	1	2	0	0
210	1	2	0	1	0	2	0	1	1	1	9999	0	0	0	1	1	1	1	0
211	0	1	1	1	0	1	0	1	1	1	2	0	1	1	0	0	1	0	0
212	0	1	0	1	1	2	1	1	1	1	1	1	0	0	1	0	2	0	0
213	0	1	0	1	0	1	0	1	1	1	2	0	0	1	1	0	2	0	0
214	1	1	0	1	1	1	0	2	0	3	9999	0	0	0	1	1	1	0	0
215	0	1	0	0	0	2	0	1	9999	2	2	0	0	1	1	0	2	1	1
216	1	1	0	1	0	1	0	1	9999	1	1	0	0	1	0	1	1	1	0
217	0	2	0	1	0	1	0	2	0	3	4	0	0	0	1	1	2	1	0
218	0	1	0	2	0	1	0	1	1	2	1	1	0	1	1	0	2	0	0
219	1	1	0	1	1	1	0	1	1	1	2	0	0	1	1	1	1	0	0
220	0	1	0	1	0	1	0	1	1	1	1	1	0	0	1	1	1	0	0
221	0	2	0	1	0	2	0	1	1	1	1	1	0	1	1	1	1	0	0
222	1	1	1	1	2	1	0	2	0	3	1	0	0	0	1	1	1	1	0
223	0	2	0	1	0	1	0	2	0	3	4	1	0	0	1	1	2	0	0
224	0	1	0	1	0	2	0	1	1	2	1	0	0	1	1	1	1	1	0
225	0	1	0	1	0	1	0	1	1	2	2	1	0	1	1	1	1	1	0
226	0	1	0	1	0	2	0	1	1	2	1	0	0	0	1	1	1	1	0
227	0	0	1	1	1	2	0	1	2	2	1	0	1	0	1	1	2	1	1
228	1	1	0	1	1	1	1	1	9999	1	9999	0	1	0	1	0	1	0	0
229	1	2	0	1	0	1	0	1	1	1	1	0	0	0	1	1	1	1	0
230	0	2	0	1	0	1	0	1	1	2	1	0	1	0	1	0	2	1	0
231	0	1	0	1	0	1	0	1	1	2	2	1	0	1	1	0	1	0	0
232	1	2	1	1	0	1	0	2	0	3	9999	0	0	0	1	0	1	1	1
233	0	2	0	1	0	1	0	1	1	2	1	0	0	0	1	1	2	1	1
234	1	2	0	1	0	2	0	2	0	3	4	0	0	0	1	1	1	1	0
235	0	2	0	1	0	2	0	1	1	1	2	1	0	1	1	0	2	1	0
236	1	1	0	1	2	0	0	2	0	3	1	0	0	1	1	1	1	0	0
237	0	2	0	1	0	1	0	1	1	1	2	0	0	0	1	0	1	0	0
238	0	0	0	0	2	0	0	1	1	2	2	0	0	0	1	0	1	0	0
239	1	0	0	1	1	1	0	2	0	3	9999	0	0	0	1	0	1	0	0
240	1	0	0	0	2	0	0	2	0	3	1	0	0	0	1	1	1	1	1
241	1	0	0	1	1	1	0	2	0	3	9999	0	0	1	1	1	1	0	0
242	1	0	1	1	1	1	0	1	1	1	2	0	0	1	0	1	2	1	0
243	1	1	0	1	0	2	0	2	0	3	9999	0	0	0	1	1	1	0	0
244	1	0	0	1	0	1	0	2	0	3	9999	0	0	1	1	1	2	1	1
245	1	2	0	1	0	1	0	2	0	3	9999	0	0	0	1	1	1	1	0
246	0	2	0	1	0	2	0	1	1	1	1	1	0	1	1	0	2	0	0
247	1	2	0	1	0	2	0	2	0	3	9999	0	0	0	1	1	2	1	1
248	0	2	0	1	0	1	0	1	1	1	1	1	0	1	1	0	1	0	0
249	1	1	0	1	0	1	1	2	0	3	9999	0	0	0	1	1	2	0	0
250	0	2	0	1	0	2	0	1	1	1	1	1	0	1	1	1	2	1	0
251	0	1	1	1	0	1	1	1	1	2	1	0	1	0	1	0	1	0	0
252	0	2	0	1	0	2	1	1	1	1	2	0	0	1	1	0	2	0	0
253	0	0	0	1	0	1	1	1	1	1	1	0	0	0	1	0	1	0	0
254	1	2	0	1	0	1	0	1	9999	1	2	0	0	0	1	0	1	0	0
255	1	0	0	1	1	2	0	2	0	3	9999	0	0	0	1	0	1	0	0
256	0	2	0	1	0	1	0	1	1	2	1	0	0	0	1	1	2	0	0
257	1	2	1	2	0	2	0	2	0	3	1	1	0	1	1	1	1	0	0
258	0	0	0	1	2	1	0	1	2	2	1	0	0	0	1	0	2	0	0
259	1	0	1	1	0	2	0	2	0	3	1	0	0	0	1	0	1	1	0
260	1	0	0	1	0	1	0	1	9999	1	1	0	0	0	1	1	2	0	0
261	1	1	1	1	1	1	0	1	1	2	1	0	1	0	1	1	1	0	0
262	0	2	0	1	0	1	0	2	0	3	4	1	0	1	0	0	2	0	0
263	0	2	0	1	0	1	0	1	1	1	2	0	0	0	1	1	2	1	1
264	0	1	0	1	0	2	0	1	1	1	1	1	0	1	1	0	1	0	0
265	1	2	0	0	0	2	0	2	0	3	9999	0	0	0	1	1	1	0	0
266	1	0	0	1	0	1	0	2	0	3	1	0	0	0	1	0	2	0	0
267	0	0	1	1	0	1	0	1	1	2	1	0	0	1	1	0	1	1	0
268	1	0	0	1	1	1	1	2	0	3	9999	0	0	0	1	1	2	1	0
269	1	2	0	1	0	1	0	2	0	3	1	0	0	0	1	1	2	1	1
270	0	2	0	1	1	1	0	1	2	1	1	0	0	1	1	0	1	0	0
271	1	1	0	2	0	2	1	1	9999	2	2	0	0	0	1	1	1	0	0
272	0	2	0	1	0	0	0	1	1	1	2	0	0	1	1	1	1	1	0
273	0	1	1	0	1	0	0	1	2	1	1	0	0	0	0	0	2	1	0
274	0	1	0	1	1	1	0	1	2	2	1	0	0	0	1	1	1	0	0
275	0	1	1	1	0	1	0	1	2	1	1	1	0	1	1	0	2	0	0
276	1	2	0	2	0	2	0	1	1	1	2	0	0	0	0	1	2	0	0
277	0	0	0	1	0	2	0	1	1	1	1	1	0	1	1	1	1	1	0
278	0	2	0	1	0	1	0	1	1	1	1	0	0	1	1	0	1	0	0
279	0	2	0	1	0	1	0	1	2	2	2	0	0	0	1	1	2	1	0
280	1	2	0	1	0	2	0	1	1	2	1	0	0	0	1	1	2	1	1
281	1	2	0	1	0	2	0	2	0	3	9999	0	0	0	1	1	2	1	1
282	1	2	0	1	0	2	1	2	0	3	1	1	0	1	1	1	1	1	0
283	1	2	0	1	0	1	0	2	0	3	2	0	0	1	1	1	1	1	0
284	1	1	0	1	0	2	0	2	0	3	1	0	0	0	1	0	1	0	0
285	1	2	0	1	0	2	0	1	9999	1	1	0	0	1	1	1	2	0	0
286	0	1	0	1	0	1	0	1	2	1	1	0	0	1	1	0	1	0	0
287	0	2	0	1	0	1	0	1	2	1	1	1	0	1	1	1	2	0	0
288	0	2	0	1	0	1	0	1	2	1	1	0	0	0	1	0	2	0	0
289	1	2	0	1	0	2	1	1	1	1	1	0	0	0	1	1	2	1	0
290	0	2	0	0	1	2	1	1	1	1	2	1	0	1	1	1	1	1	0
291	0	1	0	1	0	1	1	1	2	1	1	0	1	1	1	0	1	0	0
292	0	2	0	0	0	2	0	1	2	1	1	0	0	1	1	0	1	0	0
293	1	0	0	1	0	1	1	2	0	3	4	0	1	0	1	1	2	1	1
294	0	0	0	1	0	2	0	1	2	1	1	0	1	1	1	0	1	1	0
295	0	0	0	1	0	1	0	1	1	2	2	0	0	1	1	0	1	0	0
296	0	2	0	1	0	1	0	1	2	2	2	0	0	1	1	0	1	0	0
297	1	1	0	0	0	2	1	2	0	3	4	1	0	1	1	1	1	0	0
298	1	1	1	1	0	2	1	2	0	3	2	0	0	0	1	0	1	0	0
299	0	1	0	1	0	2	0	1	2	1	1	0	0	1	0	1	2	1	1
300	0	0	0	1	0	2	1	2	0	3	1	0	0	1	1	0	2	1	0
301	1	1	0	2	1	2	0	1	2	1	1	0	0	1	1	0	1	0	0
302	0	0	0	1	1	2	1	1	1	1	1	0	0	1	1	0	1	0	0
303	0	2	0	1	1	1	0	1	2	1	1	0	0	1	1	0	1	1	1
304	0	1	0	2	0	2	1	1	1	2	1	0	0	1	1	0	2	0	0
305	1	1	0	1	0	1	0	1	9999	1	2	0	0	1	1	1	1	1	0
306	1	0	0	1	1	2	0	1	1	1	1	0	0	0	1	1	2	1	0
307	0	0	0	0	0	2	1	1	2	2	1	1	1	1	1	0	1	0	0
308	0	2	0	1	0	1	0	1	1	1	1	1	0	1	1	0	1	1	0
309	0	1	0	1	0	2	0	1	2	1	1	0	0	0	1	0	2	0	0
311	0	1	0	1	0	1	0	1	1	1	2	0	0	0	1	0	2	0	0
312	1	1	0	1	1	2	1	2	0	3	2	0	0	0	1	1	2	1	0
313	1	0	0	1	1	1	0	2	0	3	1	0	0	0	1	0	1	0	0
314	0	2	0	1	0	1	0	1	2	1	1	0	0	0	1	0	1	1	0
315	0	2	0	1	1	0	0	1	2	1	1	0	0	0	1	1	1	0	0
316	1	0	0	1	0	1	0	2	0	3	4	0	0	0	1	0	1	0	0
317	1	2	0	1	0	1	0	1	2	1	1	0	0	0	1	1	1	1	0
318	0	2	0	1	0	1	1	1	1	2	1	0	0	0	1	0	1	0	0
319	1	2	0	1	0	1	1	2	0	3	1	0	0	0	1	1	2	1	0
320	1	1	0	1	0	2	1	2	0	3	1	0	0	0	1	1	2	1	0
321	0	1	0	1	0	1	1	1	2	2	1	0	1	1	1	0	2	0	0
322	1	1	0	1	0	1	0	1	1	1	2	0	0	0	1	0	1	0	0
323	0	1	0	1	0	1	0	1	1	2	1	0	0	1	1	1	1	0	0
324	0	0	0	1	0	1	0	1	9999	1	2	0	0	1	1	0	2	0	0
325	1	2	1	1	0	2	0	1	2	1	1	0	0	0	1	1	2	1	0
326	0	0	1	1	2	0	1	1	2	1	1	0	0	0	1	1	1	1	1
327	1	0	0	1	0	2	0	1	2	1	2	0	0	1	1	1	2	1	0
328	1	2	0	1	0	1	0	1	2	1	1	0	0	0	1	1	2	0	0
329	1	2	0	1	0	2	0	1	1	2	1	0	0	0	1	1	2	0	0
330	1	0	0	1	2	2	0	1	2	2	1	0	0	1	1	0	2	0	0
331	0	1	0	2	1	2	0	1	2	1	1	0	0	1	1	0	2	1	1
332	1	2	0	1	0	2	0	1	2	1	1	0	0	0	1	0	2	1	0
333	0	2	0	1	0	2	0	1	2	1	1	0	0	0	1	0	1	0	0
334	1	0	0	1	1	0	0	1	9999	1	2	0	0	0	1	0	1	0	0
335	0	0	0	1	1	2	0	1	2	1	1	0	1	0	1	0	1	0	0
336	1	1	0	1	0	1	0	1	2	1	1	0	0	1	1	1	1	0	0
337	0	1	0	1	0	2	1	1	2	1	1	0	0	1	1	0	1	0	0
338	0	2	0	1	0	1	0	1	2	1	1	1	0	1	1	0	1	0	0
339	1	2	0	1	0	2	0	1	1	1	1	0	0	0	1	1	2	1	0
340	1	0	0	1	2	1	0	1	2	1	1	0	0	1	1	0	2	0	0
341	1	2	0	1	0	2	0	1	2	1	1	0	0	1	1	0	1	0	0
342	1	0	0	1	1	1	0	1	9999	1	2	0	0	1	1	0	1	0	0
343	0	1	0	1	1	0	0	1	2	2	1	0	0	1	1	0	1	0	0
344	0	0	0	1	1	2	1	1	2	1	1	0	0	0	1	0	2	0	0
345	0	2	0	1	0	1	0	1	1	1	1	0	0	0	1	1	2	0	0
346	1	2	0	1	0	1	1	1	2	1	1	0	0	0	1	1	1	1	1
347	0	1	0	0	0	1	0	1	2	1	1	0	0	1	1	0	1	1	1
348	1	2	0	1	0	1	0	2	0	3	1	0	1	0	1	1	1	0	0
349	0	0	0	1	2	1	0	1	2	1	1	0	0	0	1	0	1	0	0
350	0	2	0	1	0	0	0	1	2	1	1	0	0	0	1	0	2	1	0
351	0	2	0	1	0	1	0	1	2	1	2	1	0	0	1	1	1	1	0
352	0	2	0	1	0	1	0	2	0	3	4	0	1	0	1	1	2	1	1
353	0	0	0	0	1	1	0	1	2	1	1	0	1	1	1	0	1	0	0
354	1	0	0	1	1	2	1	1	2	1	1	0	0	0	1	0	2	1	1
355	1	1	0	1	0	2	0	2	0	3	9999	0	0	0	1	0	2	0	0
356	0	2	0	1	0	1	0	1	2	1	1	0	0	1	1	0	1	0	0
357	1	2	0	1	0	2	0	2	0	3	1	0	0	0	1	1	1	0	0
358	1	2	0	1	0	2	0	2	0	3	9999	0	0	0	1	1	1	1	1
359	0	1	1	1	0	1	0	1	1	1	2	0	0	1	1	0	1	0	0
360	1	2	0	1	0	2	1	2	0	3	1	0	0	0	1	1	2	0	0
361	0	1	0	1	0	2	0	1	2	1	1	0	0	1	1	1	1	0	0
362	1	0	0	1	1	2	0	2	0	3	1	0	0	1	1	1	1	0	0
363	1	1	0	1	0	0	0	1	9999	1	1	0	0	1	1	1	1	0	0
364	0	0	0	0	1	0	0	1	2	1	1	0	0	1	1	0	1	0	0
365	0	0	0	0	0	1	0	1	2	1	1	0	1	1	0	0	1	0	0
366	1	2	0	1	0	2	0	2	0	3	1	0	0	1	1	1	2	1	0
367	1	1	0	2	0	2	1	2	0	3	1	0	0	0	1	0	2	1	0
368	0	1	0	1	0	0	0	1	2	2	1	0	0	0	1	1	1	0	0
369	0	2	0	1	0	1	0	1	2	1	1	0	0	1	1	1	1	0	0
370	0	2	1	1	0	1	1	1	1	2	2	0	0	0	1	0	1	0	0
371	1	0	0	1	2	2	0	1	1	1	2	1	0	0	1	0	2	1	0
373	0	0	0	1	1	1	0	1	2	1	1	0	0	1	1	0	1	0	0
374	0	0	0	1	1	2	0	1	1	2	1	0	1	1	0	0	2	1	0
375	1	2	0	1	0	2	0	2	0	3	2	0	0	0	1	1	2	0	0
376	0	0	0	1	1	1	0	1	2	1	2	0	1	1	0	1	1	1	1
377	1	2	0	0	0	2	0	1	1	1	2	0	0	0	1	0	1	1	0
378	1	2	0	1	0	2	0	2	0	3	9999	0	0	0	1	0	1	1	0
379	0	1	0	1	1	2	0	2	0	3	4	0	0	0	1	0	1	0	0
380	1	1	0	1	0	2	0	1	1	1	2	0	1	0	1	1	2	1	0
381	0	2	0	1	0	0	0	1	2	2	1	0	1	1	1	0	1	0	0
382	1	0	0	1	0	2	0	1	9999	2	1	0	0	0	1	1	2	1	0
383	1	1	0	1	0	2	1	2	0	3	1	0	0	0	1	1	2	0	0
384	0	2	0	1	0	0	0	2	0	3	1	0	0	1	1	0	1	0	0
385	0	2	1	1	0	1	0	1	9999	1	2	1	0	1	1	0	1	0	0
386	0	0	0	0	2	1	0	2	0	3	4	0	1	1	1	1	2	1	1
387	1	1	0	1	0	2	0	2	0	3	2	0	0	0	1	1	1	1	1
388	1	1	0	1	0	1	0	1	2	1	1	0	0	0	1	1	2	0	0
389	1	2	0	1	0	2	0	2	0	3	2	0	1	0	1	1	2	1	0
390	0	2	1	1	0	1	0	1	1	1	2	0	0	1	1	0	1	1	1
391	0	1	0	1	2	1	0	1	2	1	1	0	0	1	1	0	1	0	0
392	0	2	0	1	0	2	0	1	1	1	1	0	0	1	1	0	2	0	0
393	0	2	0	1	0	1	0	2	0	3	4	1	0	0	0	1	2	1	1
394	1	0	0	1	0	1	0	2	0	3	2	0	0	0	1	0	1	0	0
395	1	2	0	1	0	1	0	2	0	3	2	0	0	0	1	1	2	0	0
396	1	1	0	1	0	2	0	2	0	3	2	0	0	0	1	1	1	0	0
397	1	0	0	1	1	2	0	1	1	1	1	0	0	0	1	1	2	0	0
398	0	0	0	1	0	2	0	1	2	1	1	1	0	1	0	1	1	1	0
399	1	2	0	1	0	2	0	2	0	3	2	0	0	0	1	1	2	0	0
400	0	2	0	1	0	2	0	1	2	2	1	0	0	1	1	0	1	0	0
401	1	0	0	1	0	2	0	1	1	9999	1	0	0	1	1	0	1	1	0
402	0	2	0	2	0	1	1	1	1	1	1	0	0	1	1	1	1	1	0
403	1	2	0	1	0	1	0	2	0	3	1	0	1	0	1	1	2	1	0
404	1	2	0	1	0	2	1	2	0	3	1	0	0	0	1	1	2	1	0
405	1	0	0	1	0	2	0	2	0	3	1	0	0	0	1	0	1	0	0
406	0	0	0	1	0	2	1	1	2	1	1	0	1	1	1	0	1	0	0
407	1	2	0	1	0	1	1	1	1	1	2	0	0	1	1	1	2	0	0
408	1	0	0	1	0	1	0	2	0	3	1	0	0	1	1	1	1	0	0
409	1	1	0	1	1	1	0	1	1	1	1	0	0	0	1	0	1	0	0
410	1	2	0	2	0	2	0	1	1	2	2	1	0	0	0	1	2	1	0
411	0	0	0	1	1	2	1	1	1	1	1	0	0	0	1	0	2	0	0
412	1	2	0	1	0	2	0	2	0	3	9999	0	0	0	1	1	2	1	1
413	1	2	0	1	0	2	0	2	0	3	1	1	0	0	1	0	1	1	0
414	0	1	0	1	1	2	0	1	1	1	1	0	0	1	1	0	1	1	0
415	0	1	0	1	0	1	0	1	1	1	2	0	0	0	1	1	1	0	0
416	1	0	0	1	1	1	0	2	0	3	1	0	1	0	1	0	1	0	0
417	1	1	0	1	0	2	0	2	0	3	4	0	0	0	1	0	2	0	0
418	0	0	0	1	0	1	0	1	2	1	2	1	0	1	1	0	2	0	0
419	1	2	0	2	0	2	0	1	9999	1	1	0	0	0	1	1	1	1	0
420	0	2	0	1	0	1	0	1	1	1	2	1	0	1	1	1	1	1	0
421	0	2	0	1	1	2	1	1	1	1	1	0	0	0	1	1	2	1	1
422	1	0	0	1	1	1	0	1	2	1	1	0	0	1	1	0	1	0	0
423	0	2	0	1	0	1	0	1	2	1	1	0	0	1	1	1	2	1	1
424	0	1	0	1	0	1	0	1	2	2	1	0	1	1	1	0	1	0	0
425	0	2	0	1	0	1	0	1	2	1	2	0	0	0	0	0	1	0	0
426	0	0	0	1	1	2	0	1	1	2	2	0	1	0	1	0	1	0	0
427	1	2	0	1	0	2	0	2	0	3	9999	0	0	0	1	0	1	1	1
428	0	0	0	1	2	1	1	1	2	2	2	0	0	1	1	0	1	0	0
429	1	0	0	1	1	2	1	1	1	1	2	0	0	0	1	0	1	0	0
430	0	2	0	1	0	1	0	1	1	2	2	1	0	0	1	1	2	0	0
431	0	2	0	1	0	1	0	1	1	1	1	0	0	1	1	1	1	1	1
432	1	2	0	1	0	2	0	1	1	1	1	0	0	0	1	1	1	1	0
433	1	1	0	1	1	1	1	1	1	1	2	0	0	0	1	1	2	1	1
434	1	2	0	1	0	1	0	2	0	3	2	0	0	0	1	1	1	0	0
435	0	0	0	1	1	2	1	1	2	2	1	0	1	1	1	0	1	0	0
436	0	2	0	1	0	1	0	1	1	1	1	1	0	0	1	0	2	1	0
437	1	1	0	1	0	2	0	1	1	1	1	0	0	0	1	1	1	0	0
438	0	2	0	1	0	2	1	1	1	2	1	1	0	1	1	0	2	1	1
439	0	2	0	1	0	2	0	1	2	1	1	0	0	0	1	0	2	1	0
440	0	2	0	1	0	1	0	1	1	1	1	1	0	0	1	0	1	0	0
441	0	0	0	1	0	2	1	1	1	1	1	0	0	1	1	0	1	0	0
442	1	2	0	2	0	2	0	1	2	1	1	0	0	0	1	1	1	1	1
443	1	2	0	1	0	2	0	1	2	2	1	0	0	1	1	1	1	1	0
444	1	1	0	1	2	1	0	1	1	1	1	0	0	1	1	1	1	0	0
445	0	1	0	1	0	2	0	1	2	1	1	1	0	1	1	0	1	0	0
447	0	2	0	1	0	1	0	1	2	1	1	0	0	1	1	0	1	1	0
448	1	0	0	1	2	2	0	1	1	2	1	0	0	0	1	0	2	0	0
449	1	2	1	1	0	2	1	1	1	2	1	1	1	0	1	1	2	1	1
450	1	0	0	1	1	2	1	1	1	1	1	0	0	0	1	0	2	0	0
451	0	0	0	1	0	2	1	1	1	2	1	1	0	1	1	1	2	0	0
452	0	1	0	1	0	1	0	1	1	1	2	1	1	1	1	1	2	0	0
453	1	2	0	1	0	1	0	1	1	2	1	0	1	0	1	1	2	1	0
454	0	2	0	1	2	2	0	2	0	3	4	0	0	0	1	1	2	0	0
455	1	1	0	1	1	2	0	1	1	9999	1	0	0	1	1	1	2	1	1
456	1	0	0	1	1	2	0	1	1	1	2	0	0	0	1	1	2	1	0
457	1	1	0	1	0	1	0	1	1	9999	1	0	0	0	0	0	2	1	1
458	1	2	1	2	0	2	1	1	1	1	1	0	0	0	1	1	2	1	1
459	0	1	0	1	0	1	1	1	2	2	1	0	0	1	1	1	1	0	0
460	1	2	0	1	0	1	0	1	2	1	1	0	0	0	1	1	2	1	1
462	1	0	0	1	1	1	0	2	0	3	2	0	0	0	1	1	1	0	0
463	1	1	0	1	0	1	0	1	1	1	2	0	0	1	1	0	1	0	0
464	0	0	0	1	1	1	1	2	0	3	4	0	0	0	1	0	1	0	0
465	1	0	0	1	0	2	0	1	2	1	1	0	0	0	1	0	2	0	0
466	0	1	0	1	0	2	1	1	2	2	1	0	0	0	1	0	1	0	0
467	0	2	0	1	0	2	0	1	2	1	1	0	0	0	1	1	2	1	1
468	0	1	0	1	0	2	1	1	2	1	1	1	0	1	1	0	2	0	0
469	0	0	0	0	0	2	0	1	1	2	1	0	0	0	1	0	1	0	0
470	1	1	0	1	0	2	0	2	0	3	1	0	0	0	1	1	1	1	1
471	1	2	0	1	0	2	1	1	1	1	1	0	0	0	1	0	1	1	0
472	1	1	0	1	0	1	0	1	2	1	2	0	0	0	1	1	2	1	1
473	1	2	0	1	0	2	0	1	1	1	2	0	0	0	1	1	2	1	0
474	1	0	0	1	0	1	0	2	0	3	2	0	0	0	1	0	2	0	0
475	1	0	0	1	1	1	0	1	1	9999	1	0	0	0	1	1	1	0	0
476	1	2	0	1	0	1	0	2	0	3	2	0	0	0	1	1	2	1	1
477	0	0	0	0	0	2	0	1	1	1	1	0	0	1	1	0	1	0	0
478	0	1	0	1	1	0	0	1	2	2	1	0	0	1	0	1	2	1	0
479	0	0	0	1	0	2	0	1	2	1	1	0	1	1	1	0	1	0	0
480	0	2	0	2	1	1	1	1	2	1	1	0	0	1	1	1	2	1	0
481	0	1	1	1	0	1	1	1	1	1	2	0	0	0	1	0	2	0	0
482	1	1	0	2	0	1	0	1	1	1	1	0	0	0	1	0	2	1	1
483	1	0	0	2	1	2	1	1	1	1	1	0	0	0	1	1	2	1	0
484	0	1	0	1	1	2	0	1	2	1	1	0	0	1	1	0	1	0	0
485	1	2	0	1	0	2	1	2	0	3	4	0	0	0	0	1	2	1	1
486	1	1	0	1	0	2	0	2	0	3	1	0	0	0	1	1	2	0	0
487	1	2	0	1	0	2	1	2	0	3	1	0	0	0	1	1	2	1	1
488	1	2	0	2	1	2	0	1	1	1	2	1	1	0	1	1	2	1	1
489	1	1	0	1	0	1	0	2	0	3	1	0	0	0	1	1	2	0	0
490	0	2	0	1	0	2	0	1	2	1	1	0	0	0	1	1	2	1	0
491	1	2	0	1	1	2	0	2	0	3	9999	0	0	0	1	1	1	1	0
492	0	1	0	1	1	0	0	1	2	1	1	0	0	0	1	1	1	0	0
493	1	0	0	1	1	1	0	2	0	3	9999	0	0	1	1	1	1	0	0
494	1	0	0	1	2	1	0	1	2	1	1	0	0	1	1	0	2	0	0
495	0	2	0	1	0	2	0	1	2	1	1	0	0	1	1	0	2	0	0
496	1	1	0	1	0	2	1	2	0	3	1	0	0	0	1	1	2	0	0
497	1	1	0	1	0	2	0	1	2	9999	1	0	0	0	1	1	1	0	0
498	1	2	0	1	0	1	0	2	0	3	9999	0	0	1	1	1	1	0	0
500	0	2	1	1	0	2	1	1	2	1	1	1	0	0	0	1	2	1	0
501	0	0	0	0	1	2	0	1	2	1	1	0	0	0	1	1	2	0	0
502	0	1	0	1	0	1	0	1	2	1	2	0	1	1	0	0	2	0	0
503	0	2	0	1	0	1	0	1	2	2	1	0	0	1	1	1	2	0	0
504	0	0	0	0	1	1	0	1	1	1	2	0	0	0	1	0	2	0	0
505	1	1	0	1	0	1	0	1	2	1	1	0	0	1	1	1	1	0	0
506	0	0	0	1	1	1	0	1	2	1	1	0	0	1	1	0	2	0	0
507	1	1	0	1	0	1	0	2	0	3	1	0	1	1	1	1	2	0	0
508	1	1	0	1	0	1	0	2	0	3	2	1	0	1	1	1	2	1	1
509	0	0	1	1	1	1	0	1	2	1	1	0	0	1	1	0	1	0	0
510	1	0	0	1	0	2	0	1	2	1	1	0	0	0	1	0	1	0	0
511	0	2	0	2	0	2	0	1	2	1	1	1	0	0	1	0	2	1	1
512	0	0	0	0	2	1	1	1	2	1	1	0	1	1	1	0	1	0	0
513	1	2	0	1	0	2	0	1	2	9999	1	0	1	0	1	1	1	0	0
514	0	2	1	1	0	2	0	1	2	9999	1	1	0	1	1	0	2	1	0
515	0	2	1	1	2	2	1	1	2	1	1	1	0	1	0	1	1	0	0
516	1	2	0	1	0	2	0	1	2	2	1	0	0	0	1	0	2	1	0
517	1	0	0	1	0	2	1	1	2	1	1	0	0	0	1	0	1	0	0
518	0	1	0	1	0	2	0	1	2	2	1	0	1	1	1	0	2	0	0
519	1	1	0	1	0	1	0	2	0	3	2	0	0	0	1	0	2	1	0
520	0	2	0	1	0	1	0	1	1	2	1	0	0	1	1	0	2	0	0
521	0	0	0	1	1	1	0	1	2	1	1	1	0	1	1	1	1	0	0
522	0	2	0	1	0	2	0	1	2	1	1	0	0	0	1	1	2	1	0
523	0	0	0	0	2	0	0	1	1	2	2	0	1	0	1	0	1	0	0
524	0	1	0	1	0	1	0	1	2	1	2	0	0	1	1	1	1	1	0
525	1	0	0	1	0	2	1	1	2	9999	2	0	0	0	1	1	2	0	0
526	1	1	0	1	0	1	0	1	2	1	1	0	0	1	1	1	2	1	0
527	1	2	0	1	0	2	0	1	2	2	2	0	0	0	1	0	1	0	0
528	0	1	0	1	0	1	0	1	2	1	1	0	0	0	1	0	1	0	0
529	0	1	0	1	0	2	0	1	2	2	1	0	0	1	1	0	2	0	0
530	0	2	1	1	0	2	0	1	2	2	1	1	0	0	1	0	1	0	0
531	1	2	0	1	0	1	1	2	0	3	9999	0	0	0	1	1	2	0	0
532	1	2	0	1	0	2	1	2	0	3	1	0	0	0	1	1	2	1	1
533	1	1	0	1	1	1	0	2	0	3	9999	0	0	0	1	0	1	0	0
534	1	1	0	1	0	2	0	2	0	3	9999	1	0	0	1	1	2	0	0
535	0	1	1	1	2	1	0	1	2	2	1	0	0	0	0	0	1	0	0
536	0	1	0	1	0	2	1	1	2	1	1	0	0	1	1	0	2	0	0
537	1	0	0	1	1	2	0	1	2	1	1	0	0	1	1	0	2	0	0
538	0	0	0	1	2	1	0	1	1	1	2	0	0	1	1	0	1	0	0
539	0	1	0	1	0	2	0	1	2	1	1	0	0	1	0	1	1	0	0
540	1	2	0	1	0	2	0	1	2	1	1	0	0	0	1	1	2	0	0
548	0	2	0	1	2	1	0	2	0	3	4	0	0	0	1	1	2	0	0
549	1	2	1	1	0	2	0	2	0	3	9999	0	0	0	1	1	1	1	1
550	0	1	0	2	1	1	0	2	0	3	4	1	0	0	1	0	1	0	0
551	1	0	0	1	2	2	0	2	0	3	1	0	1	0	1	0	2	0	0
553	0	1	0	1	0	1	0	1	2	2	2	0	0	0	1	1	2	1	0
554	1	2	0	1	0	1	0	2	0	3	9999	0	0	1	1	1	1	0	0
556	1	2	1	1	0	2	1	1	1	1	2	0	0	0	1	1	2	1	0
557	0	2	0	1	0	1	0	2	0	3	4	0	1	1	1	1	1	0	0
558	0	1	0	1	0	1	0	1	2	2	1	0	0	0	1	1	2	0	0
559	0	0	0	1	1	2	1	1	2	1	1	0	0	1	1	0	2	0	0
561	1	2	0	2	0	1	0	2	0	3	4	0	0	0	1	1	1	0	0
562	1	2	0	1	0	2	1	1	2	1	2	0	0	0	1	1	2	1	1
564	0	2	0	1	0	1	0	2	0	3	4	0	0	0	0	1	2	0	0
565	0	2	0	1	0	1	0	1	2	1	1	0	0	1	1	0	2	1	1
566	1	1	0	1	0	1	0	2	0	3	1	0	0	0	1	1	1	0	0
567	0	1	0	1	0	1	0	1	2	1	1	0	1	1	1	0	2	1	0
568	0	2	0	1	0	0	0	2	0	3	4	0	0	1	1	1	2	0	0
570	1	0	0	1	1	2	0	2	0	3	4	0	0	0	1	0	1	0	0
571	1	0	0	1	0	2	0	2	0	3	9999	0	0	0	1	1	2	0	0
572	1	0	0	1	0	1	0	2	0	3	4	0	0	1	1	1	2	0	0
574	1	0	0	1	2	2	1	2	0	3	1	0	0	0	1	1	2	1	0
575	0	0	0	0	2	0	1	1	1	1	2	0	0	0	1	0	1	0	0
576	0	2	0	1	0	2	0	1	9999	1	1	0	0	1	1	1	2	1	1
577	1	0	0	1	1	2	0	2	0	3	4	0	0	0	1	1	2	1	1
578	0	2	0	1	0	1	0	2	0	3	4	1	0	1	1	1	1	0	0
579	1	2	0	1	1	0	0	2	0	3	4	0	0	1	1	1	1	1	0
580	0	0	0	1	1	1	0	2	0	3	4	0	1	1	1	0	1	0	0
581	0	2	0	1	0	1	0	2	0	3	4	0	0	1	1	0	1	1	1
582	0	0	0	1	2	1	0	2	0	3	4	0	0	1	1	0	1	0	0
583	0	1	0	1	0	2	0	2	0	3	4	0	0	1	9999	0	1	0	0
585	0	2	1	2	1	2	0	2	0	3	4	1	0	0	1	0	1	0	0
586	0	0	0	1	0	1	1	1	2	2	1	0	0	1	1	0	1	0	0
587	0	2	0	1	1	1	0	2	0	3	4	1	0	1	1	1	1	1	1
588	1	1	0	1	1	1	0	2	0	3	9999	0	0	0	1	0	2	1	0
589	1	2	0	1	0	2	0	2	0	3	4	0	0	0	0	1	2	1	1
590	0	0	0	1	0	1	1	1	2	1	1	0	0	0	1	0	1	0	0
591	1	1	0	1	0	2	0	2	0	3	1	0	0	0	1	1	1	0	0
592	1	2	0	1	0	2	0	2	0	3	1	0	0	0	1	1	2	1	0
593	0	1	0	1	0	2	0	2	0	3	4	1	1	1	1	0	1	1	1
594	0	2	0	1	2	0	0	2	0	3	4	0	0	1	1	0	1	0	0
595	1	1	0	1	0	1	0	1	9999	9999	1	0	0	1	1	1	1	0	0
596	1	0	0	1	1	2	0	2	0	3	4	0	0	0	1	0	1	0	0
598	0	0	0	1	2	1	1	2	0	3	4	0	0	0	1	0	2	0	0
599	1	0	0	1	1	1	0	1	2	1	2	0	0	1	1	0	1	1	0
600	0	2	0	1	0	0	0	2	0	3	4	0	1	0	1	1	1	1	0
602	1	2	0	1	0	2	1	2	0	3	1	0	0	0	1	0	1	0	0
603	0	1	0	1	0	1	0	1	2	1	2	0	1	1	1	1	2	0	0
604	0	2	0	1	0	0	0	1	1	2	2	0	1	1	1	1	2	1	0
605	0	1	0	1	0	2	0	1	2	1	1	0	0	1	1	1	1	0	0
606	1	2	0	1	0	2	1	1	2	1	1	0	0	0	1	1	2	1	1
607	0	1	0	1	0	2	0	1	2	2	2	0	0	1	1	1	1	0	0
608	1	2	0	1	0	2	0	1	2	1	1	0	0	1	1	1	1	1	0
609	0	1	0	1	1	2	1	1	2	1	2	0	0	0	1	0	2	0	0
610	1	0	0	1	1	1	0	2	0	3	1	0	1	0	1	0	1	0	0
611	0	2	1	1	0	0	0	1	2	1	1	1	0	1	1	1	1	1	1
612	0	2	0	0	0	1	0	1	2	1	1	0	0	1	1	0	2	1	0
613	0	0	0	1	1	0	1	1	2	1	2	0	1	1	1	1	1	0	0
614	0	2	0	0	0	1	0	1	2	2	1	1	0	1	1	0	1	0	0
615	1	1	0	1	0	1	0	1	2	1	1	0	0	0	1	1	2	0	0
616	1	0	0	1	0	1	1	2	0	3	1	0	0	1	1	0	1	0	0
617	0	2	0	1	0	2	1	1	1	2	2	0	0	1	0	0	1	0	0
618	0	1	0	1	0	1	0	2	0	3	9999	0	0	1	1	1	1	1	0
619	0	1	0	1	1	1	0	1	2	1	1	1	1	1	1	0	1	0	0
620	0	2	0	1	0	2	0	1	2	1	1	1	0	1	1	0	2	1	0
621	1	1	0	1	2	1	0	1	1	1	2	0	0	1	1	1	2	0	0
622	1	0	0	1	2	1	1	2	0	3	2	0	1	0	1	0	1	0	0
623	0	2	0	1	0	1	0	1	2	2	1	1	0	0	1	0	1	1	0
624	1	0	0	1	0	2	0	1	2	1	1	0	1	0	1	0	1	0	0
625	0	0	0	0	1	2	0	2	0	3	1	0	0	0	1	0	1	0	0
626	1	2	0	1	0	2	1	1	2	2	1	0	0	0	1	1	1	0	0
627	1	0	0	1	0	2	0	2	0	3	2	0	0	0	1	1	2	1	1
628	0	0	0	1	0	2	0	1	2	1	1	0	0	0	0	0	2	1	0
629	0	1	0	1	0	1	0	1	2	1	1	0	0	1	1	0	1	0	0
630	0	0	0	0	1	1	1	1	2	1	1	0	0	1	1	0	2	0	0
631	0	0	0	0	2	0	0	1	2	1	1	0	1	1	1	0	1	0	0
632	1	0	0	1	0	2	0	1	2	2	1	0	0	0	1	1	1	0	0
633	0	2	0	1	0	1	0	1	1	2	2	0	1	1	1	0	1	1	0
634	0	0	1	1	1	2	0	1	1	1	1	0	0	1	1	0	1	0	0
635	0	2	0	1	0	2	0	1	1	2	2	0	0	1	1	1	1	0	0
636	1	0	0	1	1	2	1	1	1	1	2	0	0	0	1	0	1	0	0
637	0	2	1	2	0	2	1	1	9999	1	2	0	0	1	1	0	2	0	0
638	1	2	0	2	0	2	0	1	2	2	2	0	0	1	1	0	1	1	0
639	1	2	0	1	0	1	1	2	0	3	2	0	1	1	1	1	1	1	0
640	0	1	0	1	0	1	0	1	2	1	1	0	0	1	1	1	2	1	0
641	1	2	1	1	0	2	1	1	1	9999	2	0	0	0	1	1	2	0	0
642	1	2	0	1	0	1	0	1	1	2	2	0	0	0	1	1	2	1	0
643	1	0	1	1	1	2	1	2	0	3	9999	0	0	0	1	1	1	0	0
644	1	1	0	1	1	0	0	2	0	3	9999	0	0	0	1	0	2	0	0
645	0	0	0	0	0	1	0	1	2	2	1	0	0	0	1	0	1	0	0
646	0	0	0	0	1	1	0	1	2	2	1	0	0	1	1	0	1	0	0
647	1	2	0	2	0	2	0	1	1	1	2	0	0	0	1	1	1	1	1
648	0	1	1	1	1	1	1	1	2	2	1	0	1	0	1	0	1	0	0
649	1	0	0	1	1	1	1	2	0	3	9999	0	1	1	1	1	1	0	0
650	0	1	1	1	0	1	0	1	2	2	1	0	0	0	1	0	1	0	0
651	0	0	0	0	0	0	0	1	2	1	1	0	0	0	1	0	1	0	0
652	0	2	0	1	0	1	0	1	2	1	2	0	0	1	1	0	1	0	0
653	0	1	0	0	0	1	0	1	2	1	1	1	0	1	1	0	1	0	0
654	0	2	1	1	0	0	1	1	2	1	2	1	0	0	1	1	2	0	0
655	0	2	0	1	0	2	0	1	2	1	1	0	1	0	1	1	1	1	0
656	0	1	0	0	2	2	0	2	0	3	2	0	1	0	1	0	2	0	0
657	1	1	0	1	0	1	0	1	1	1	1	0	1	1	1	1	1	0	0
658	1	0	1	1	0	2	0	2	0	3	9999	0	0	1	1	0	1	0	0
659	0	0	0	0	1	1	1	1	2	2	2	0	1	0	1	1	1	1	0
660	0	2	0	1	1	1	1	1	2	2	1	0	0	1	1	0	1	0	0
661	1	1	0	1	0	1	0	2	0	3	2	0	0	1	1	0	1	0	0
662	1	0	0	1	2	1	1	1	1	1	1	0	1	0	1	1	1	0	0
663	1	2	1	1	0	1	0	2	0	3	2	0	0	1	1	1	1	1	0
664	0	2	0	1	0	1	0	1	2	1	2	0	0	1	1	0	1	0	0
665	0	2	0	2	0	2	1	1	1	1	2	1	0	1	1	0	1	0	0
666	0	0	0	1	1	1	0	1	1	1	2	0	1	0	1	0	1	0	0
667	0	1	0	1	1	0	0	1	2	1	2	0	1	1	1	1	1	0	0
668	1	1	0	1	0	2	0	2	0	3	4	0	0	0	1	1	2	1	0
669	1	2	0	1	0	2	0	1	2	1	2	0	0	0	1	1	2	1	0
670	0	0	1	1	1	2	1	1	2	1	2	0	0	0	1	0	2	0	0
671	1	1	0	1	0	2	0	2	0	3	9999	0	0	0	1	0	1	0	0
672	1	0	0	1	2	0	0	2	0	3	4	0	0	0	1	0	1	0	0
675	0	1	0	1	0	1	1	1	2	2	2	0	0	1	1	0	1	0	0
676	0	2	0	1	0	2	0	1	2	1	1	1	0	1	1	0	1	0	0
678	0	1	0	1	0	1	1	1	2	1	1	0	0	0	1	1	1	0	0
679	1	2	0	1	0	1	0	2	0	3	1	0	0	0	1	1	2	1	0
680	1	1	0	1	0	1	0	1	9999	9999	1	0	0	0	1	1	1	0	0
681	0	1	0	1	2	1	0	2	0	3	4	0	1	1	1	0	2	0	0
682	0	0	0	1	0	1	0	2	0	3	4	0	0	1	1	0	1	0	0
683	0	0	0	1	0	1	0	2	0	3	4	1	0	1	1	1	1	0	0
685	0	0	0	1	1	2	0	2	0	3	4	0	0	1	1	0	2	0	0
687	1	1	0	1	1	1	0	2	0	3	2	0	0	0	1	1	2	1	0
688	0	2	0	1	0	1	0	2	0	3	4	1	0	1	1	1	1	1	0
689	0	0	0	0	0	1	0	1	2	1	1	0	0	0	1	1	2	1	1
690	0	0	0	0	1	1	0	1	2	1	2	1	1	1	1	0	2	0	0
693	0	0	0	0	2	0	0	2	0	3	4	0	0	0	1	0	1	1	1
694	0	0	0	1	0	1	0	2	0	3	9999	0	0	1	1	0	1	0	0
696	1	1	0	1	1	0	0	2	0	3	4	0	0	1	1	0	1	0	0
697	0	1	0	1	0	1	0	2	0	3	4	1	0	0	1	0	1	0	0
699	1	1	0	1	0	1	0	1	2	1	1	0	0	1	1	1	2	1	0
700	1	0	0	1	0	1	0	1	1	1	2	0	0	0	1	0	1	0	0
701	1	0	0	1	1	2	1	2	0	3	9999	0	0	1	1	1	1	0	0
702	1	0	0	1	0	1	0	1	2	1	1	0	0	0	1	0	1	1	0
703	1	2	0	1	2	1	0	1	2	1	2	0	0	0	1	1	2	1	1
704	1	0	0	0	1	1	0	2	0	3	1	0	0	0	1	1	1	0	0
705	1	1	0	1	0	1	0	2	0	3	4	0	0	1	1	1	1	1	0
706	1	2	1	2	0	2	0	1	2	1	1	0	0	0	1	1	2	1	0
707	0	2	0	1	0	1	0	2	0	3	4	0	0	0	1	1	1	1	1
708	1	1	0	1	1	1	0	1	2	1	1	0	0	0	1	1	2	1	0
709	1	2	0	2	0	1	0	1	2	9999	1	0	0	0	1	1	1	1	1
710	1	1	0	1	0	1	0	1	2	1	2	0	1	0	1	1	2	1	0
711	0	2	0	1	0	2	0	1	1	2	1	1	0	1	1	0	1	0	0
712	0	0	0	0	1	1	0	1	2	1	1	0	0	0	1	0	2	0	0
713	1	0	0	1	0	2	0	2	0	3	9999	0	1	1	1	0	2	0	0
714	0	1	0	1	1	2	1	1	2	2	1	1	0	1	1	0	2	1	0
715	0	2	0	0	0	2	0	1	2	2	1	0	1	0	1	1	1	0	0
716	0	2	0	2	0	2	0	2	0	3	2	1	0	1	1	1	1	1	1
717	0	1	0	1	0	2	0	1	2	2	1	0	1	1	1	0	2	1	0
718	0	1	0	1	0	1	0	1	2	1	1	0	0	1	1	1	1	1	1
719	0	0	0	1	0	2	0	1	2	1	1	0	1	1	1	0	1	0	0
720	0	2	0	2	0	2	1	1	1	1	2	1	0	1	1	0	1	1	0
721	0	0	0	1	1	1	0	1	2	1	1	1	0	1	1	0	2	0	0
722	1	2	0	1	0	2	0	2	0	3	1	0	0	0	1	1	2	0	0
723	1	1	1	1	1	2	1	1	2	2	1	0	1	0	0	1	2	1	1
724	1	1	0	1	0	1	0	1	2	1	1	0	1	0	1	1	1	1	0
725	0	1	0	1	0	2	0	1	2	2	1	0	0	1	1	1	1	1	0
726	1	2	0	1	2	0	0	1	2	1	1	0	0	1	1	1	2	1	0
727	0	0	0	1	0	2	0	1	2	1	1	0	0	0	1	0	2	1	0
728	0	1	0	1	0	1	0	1	2	2	1	0	0	0	1	0	2	0	0
729	1	0	0	1	2	1	0	1	1	1	1	0	1	0	1	0	1	0	0
730	0	0	0	1	0	2	0	1	2	1	1	0	1	1	1	0	1	0	0
731	0	2	0	1	0	1	0	1	2	2	1	0	0	1	1	0	1	0	0
732	0	2	0	1	0	2	0	1	2	1	1	0	0	1	1	0	1	0	0
733	1	2	1	2	0	0	0	2	0	3	4	0	1	0	1	1	2	1	0
734	1	2	0	2	0	2	0	1	2	2	1	0	1	0	1	1	1	0	0
735	0	2	0	1	0	2	0	1	1	2	1	1	0	1	1	1	1	1	0
736	1	1	0	1	0	2	1	1	2	1	1	0	1	0	1	0	2	0	0
737	0	2	0	1	0	1	0	1	2	2	1	1	0	1	1	0	1	0	0
738	0	0	0	1	1	2	1	1	2	2	1	0	1	0	1	1	1	1	1
739	0	1	1	0	0	2	0	1	1	1	2	0	0	0	1	0	1	0	0
740	0	1	1	1	0	1	0	1	2	1	1	0	1	1	1	0	1	0	0
741	1	1	0	1	1	2	0	1	2	1	1	0	1	1	1	0	1	0	0
742	1	1	0	1	0	1	0	1	9999	2	1	0	0	0	1	1	2	1	0
743	1	1	0	2	0	2	1	1	2	1	2	0	0	0	1	1	1	1	1
744	0	0	1	1	1	1	1	1	2	1	1	1	0	1	1	0	2	0	0
745	1	1	0	1	0	2	0	2	0	3	1	0	0	0	1	1	2	1	1
746	1	1	0	2	0	1	0	2	0	3	1	0	0	0	1	0	1	1	0
747	1	0	0	0	2	1	0	1	2	1	1	0	1	0	1	1	2	0	0
748	1	2	0	1	1	2	0	1	2	1	1	0	0	0	1	1	2	1	1
749	0	1	0	1	0	0	0	1	2	1	1	0	0	1	1	1	1	1	0
750	0	1	0	1	1	1	0	1	2	1	1	1	0	1	1	0	2	1	1
751	1	1	0	1	0	1	0	2	0	3	2	0	1	1	1	1	2	1	1
752	1	2	0	1	0	2	0	1	2	1	2	0	0	0	1	0	1	0	0
753	1	2	0	1	0	1	0	1	2	1	1	0	0	1	1	1	1	1	0
754	1	1	0	1	0	1	0	1	2	1	1	0	0	0	1	1	2	1	1
755	0	2	0	1	0	2	0	1	2	1	9999	0	0	0	1	0	1	1	0
756	1	1	0	1	0	0	0	1	2	2	1	0	0	0	1	1	1	0	0
757	1	1	0	2	0	2	1	1	2	1	1	0	0	1	1	1	1	1	0
758	0	2	0	1	0	1	0	1	2	2	1	0	0	0	0	1	2	1	1
760	0	0	0	1	1	1	0	1	2	1	1	0	0	0	1	0	1	0	0
761	1	0	0	1	1	2	0	1	2	1	1	0	0	0	1	1	2	0	0
762	0	2	0	1	0	1	0	1	2	1	1	0	0	1	1	1	2	1	0
763	1	2	0	1	2	1	0	2	0	3	4	0	0	0	1	1	1	1	0
764	0	1	0	1	0	2	1	1	9999	2	1	1	0	1	1	1	1	0	0
765	1	0	0	1	0	2	0	1	2	1	1	0	0	0	1	1	2	0	0
766	0	2	0	1	0	1	0	1	2	2	1	0	0	0	1	1	1	0	0
767	0	2	0	1	0	2	0	1	2	1	1	0	0	1	1	0	1	0	0
768	0	2	0	1	0	1	0	1	2	2	1	0	0	0	0	0	2	0	0
769	1	2	0	2	2	1	0	1	2	2	1	0	1	0	1	1	1	1	0
770	0	2	0	1	0	1	0	1	2	1	1	0	0	1	1	0	2	0	0
771	1	2	0	1	0	1	0	1	1	1	1	0	0	0	1	1	2	1	0
772	0	2	0	1	0	0	0	2	0	3	4	0	0	0	1	1	1	0	0
773	0	2	0	1	0	2	0	1	2	1	1	0	0	1	1	0	1	1	1
774	0	0	0	0	1	2	0	1	2	1	2	0	0	1	1	0	2	0	0
775	0	1	0	1	1	1	0	1	2	1	1	0	0	1	1	1	1	1	0
776	0	0	0	1	0	2	0	1	2	1	1	0	0	1	1	0	1	0	0
777	0	0	0	1	0	1	1	1	2	1	1	0	0	1	1	0	1	0	0
778	1	0	0	1	0	2	1	2	0	3	1	0	0	1	1	1	2	0	0
779	1	2	0	1	0	2	0	2	0	3	1	0	0	0	1	1	1	1	0
780	0	1	0	1	0	1	0	1	2	1	1	0	0	1	1	0	1	0	0
781	0	0	1	1	1	2	0	1	2	2	1	1	1	1	1	0	1	0	0
782	0	1	0	1	0	1	0	1	2	1	1	0	0	1	0	0	1	0	0
783	0	1	0	1	0	2	1	1	2	1	1	1	0	1	1	0	1	0	0
784	1	2	0	1	0	2	0	1	2	1	1	0	0	0	1	1	2	0	0
785	1	1	0	1	0	1	0	1	1	2	1	0	0	0	1	1	2	0	0
787	0	0	1	1	2	1	0	1	1	1	2	0	1	1	1	0	1	0	0
788	0	1	0	1	1	1	0	1	2	1	1	1	1	1	1	1	2	1	0
789	1	1	1	1	1	2	1	1	2	2	1	0	0	0	1	0	2	0	0
790	1	0	0	1	0	1	1	2	0	3	9999	0	0	0	1	1	2	0	0
791	0	2	0	1	0	2	1	1	2	1	1	0	0	1	1	0	1	0	0
792	1	0	0	1	1	1	0	1	2	1	1	0	0	0	1	1	2	0	0
793	0	2	0	1	0	2	0	1	2	2	1	0	0	1	1	1	1	0	0
794	1	2	0	1	0	0	0	2	0	3	1	0	0	1	1	1	1	0	0
795	0	0	0	1	0	2	0	1	2	2	1	0	0	0	1	0	2	0	0
796	0	0	0	1	0	2	1	1	2	1	1	0	0	0	1	1	2	1	0
797	0	2	1	1	1	1	0	1	2	2	1	0	0	1	0	0	2	0	0
798	0	2	0	1	0	1	0	1	2	1	1	1	0	0	1	0	1	1	0
799	1	0	0	1	0	2	1	2	0	3	1	0	0	0	1	1	2	0	0
800	0	2	0	1	0	2	0	1	2	2	1	1	0	0	1	0	1	0	0
801	0	1	0	1	0	2	0	1	2	1	1	0	1	1	1	0	1	0	0
802	0	1	0	1	1	2	0	1	2	1	1	0	1	0	0	0	1	0	0
803	0	1	0	1	1	1	0	1	2	1	1	0	0	0	0	0	2	1	1
804	0	1	0	1	0	1	0	1	2	1	1	0	1	0	1	0	2	0	0
805	0	2	0	1	0	1	0	1	1	2	2	0	0	0	1	0	2	1	1
806	0	2	0	1	0	1	0	1	2	1	1	0	0	1	1	1	2	1	1
807	1	0	0	1	1	2	0	2	0	3	1	0	0	1	1	0	1	0	0
808	0	1	0	1	1	1	0	1	2	2	1	0	1	1	0	0	2	0	0
809	1	2	0	1	0	2	1	1	2	1	1	0	1	1	1	0	2	0	0
810	1	0	0	1	0	2	0	1	2	1	1	0	0	0	1	1	2	1	1
811	1	0	0	1	0	2	0	1	2	2	1	0	0	0	1	1	2	1	0
812	1	2	0	1	0	1	0	1	2	1	1	0	0	0	1	1	2	1	0
813	0	2	0	1	0	1	0	1	2	2	1	1	0	0	0	0	1	1	1
814	1	2	0	1	0	2	1	2	0	3	9999	0	0	0	1	1	1	0	0
815	1	0	0	1	1	1	0	1	2	1	1	0	0	1	1	0	1	0	0
816	0	2	0	1	0	2	0	1	1	1	1	1	0	0	1	1	2	1	1
817	0	2	0	1	0	1	0	1	2	2	1	1	0	0	1	0	2	0	0
818	0	2	0	1	0	2	0	1	2	1	2	0	0	1	1	0	1	1	0
819	1	2	0	1	0	2	0	1	2	1	1	0	0	0	1	1	2	1	1
820	0	2	0	1	0	2	0	1	2	1	1	0	0	1	1	0	2	1	1
821	0	1	0	1	1	2	0	2	0	3	4	0	1	0	1	0	1	1	1
822	1	0	0	1	0	1	0	2	0	3	1	0	0	0	1	1	1	0	0
823	0	1	0	1	2	1	1	1	2	2	1	0	0	0	1	1	1	1	0
824	1	0	0	1	1	1	0	2	0	3	9999	0	0	0	1	1	2	0	0
